# Supplementary material
Source: PubMed Central journal article supplement (PMC4076465)

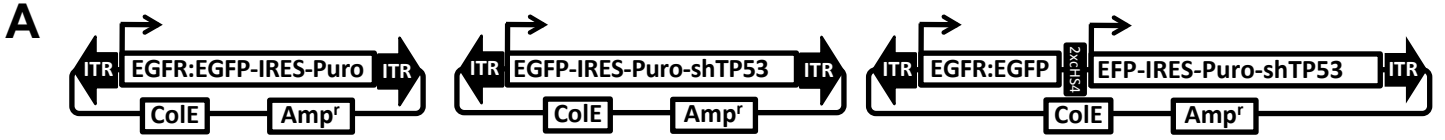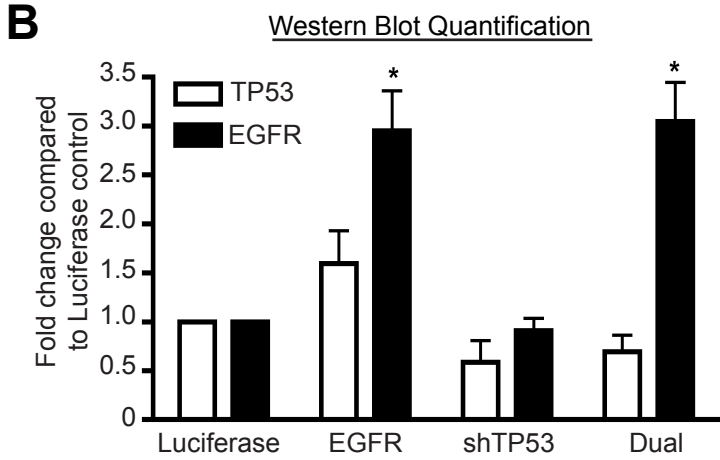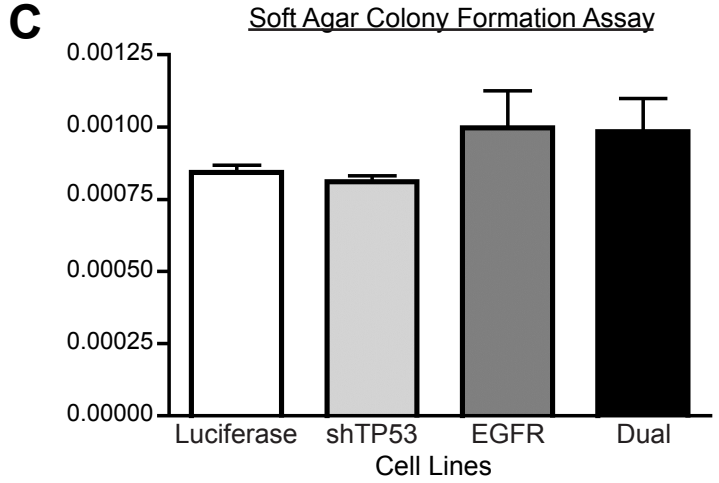

**D**

Wildtype *TP53* GCCATGGAGGAGCCGCAGTCAGATCCTAGCGTCGAGCCCCCTCTGAGTCAGGAAACATTTT  
*TP53* KO mutation GCCATGGAGGAGCCGCAGTCAGA-----GTCAGGAAACATTTT

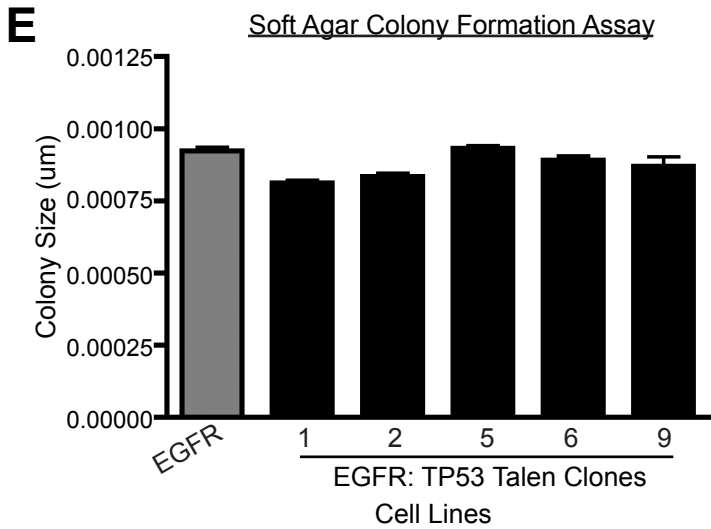

Supplement: mmc1.pdf [file mmc1.pdf]
